# Supplementary material
Source: PubMed Central journal article supplement (PMC7557949)
Supplement: ao0c03773_si_001.pdf [file ao0c03773_si_001.pdf]

## **Supporting Information**

### **Design and Synthesis of a New Class of Pyridine-Based *N*-Sulfonamides Exhibiting Antiviral, Antimicrobial and Enzyme Inhibition Characteristics**

Rasha A. Azzam, Rasha E. Elsayed and Galal H. Elgemeie\*

Chemistry Department, Faculty of Science, Helwan University, Cairo, Egypt, 11795

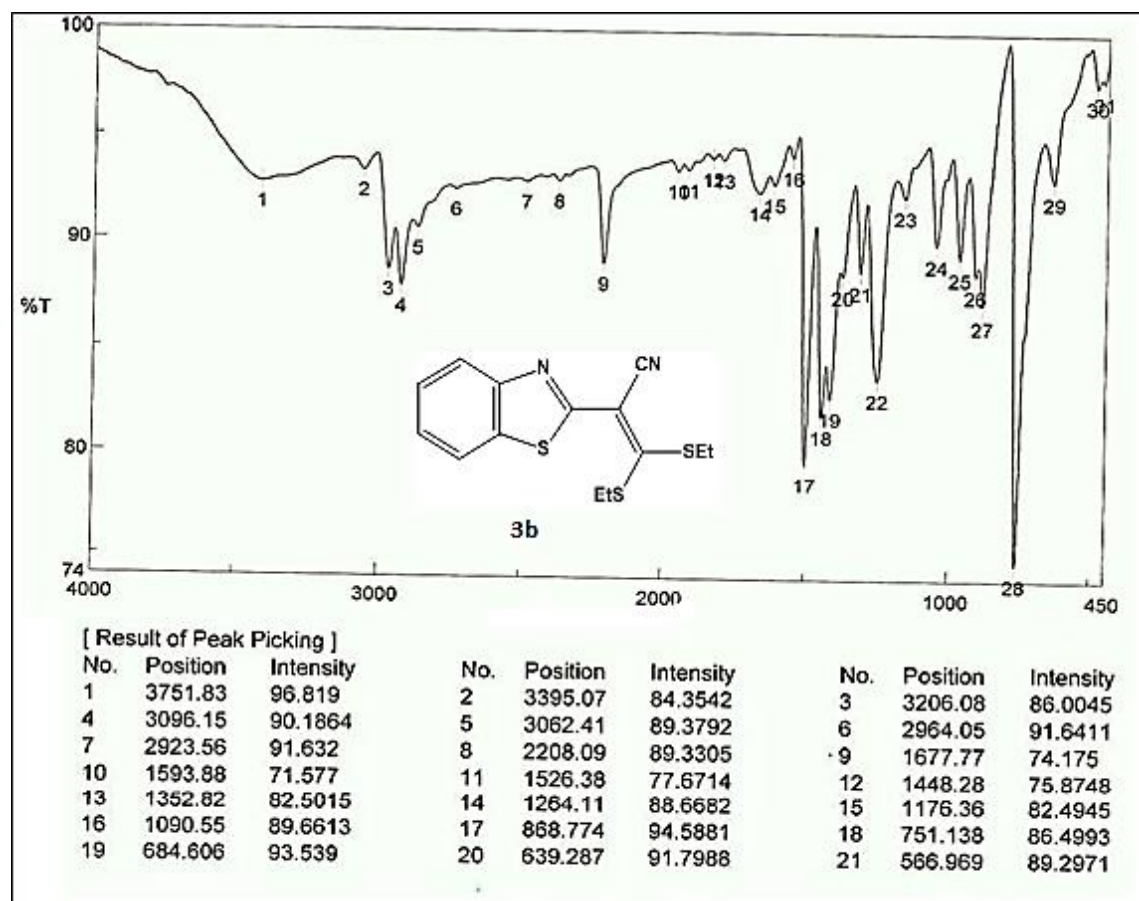

**Figure S1** IR Spectrum of compound **3b**

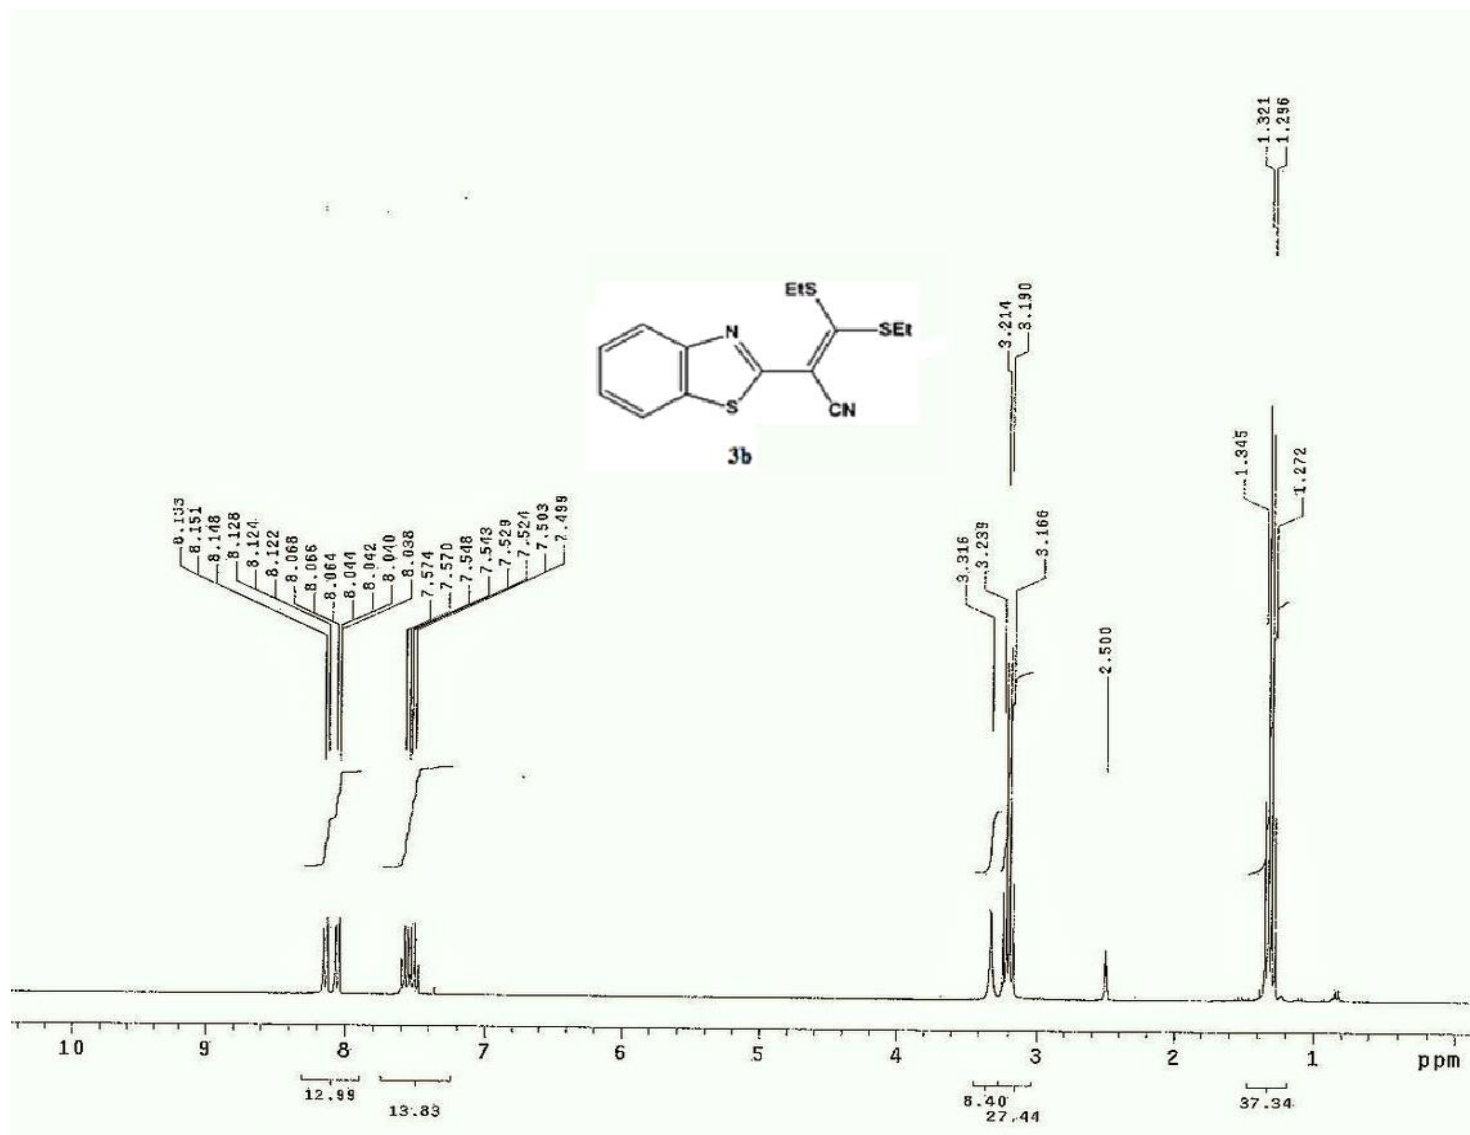

Figure S2 <sup>1</sup>H NMR Spectrum of compound **3b**

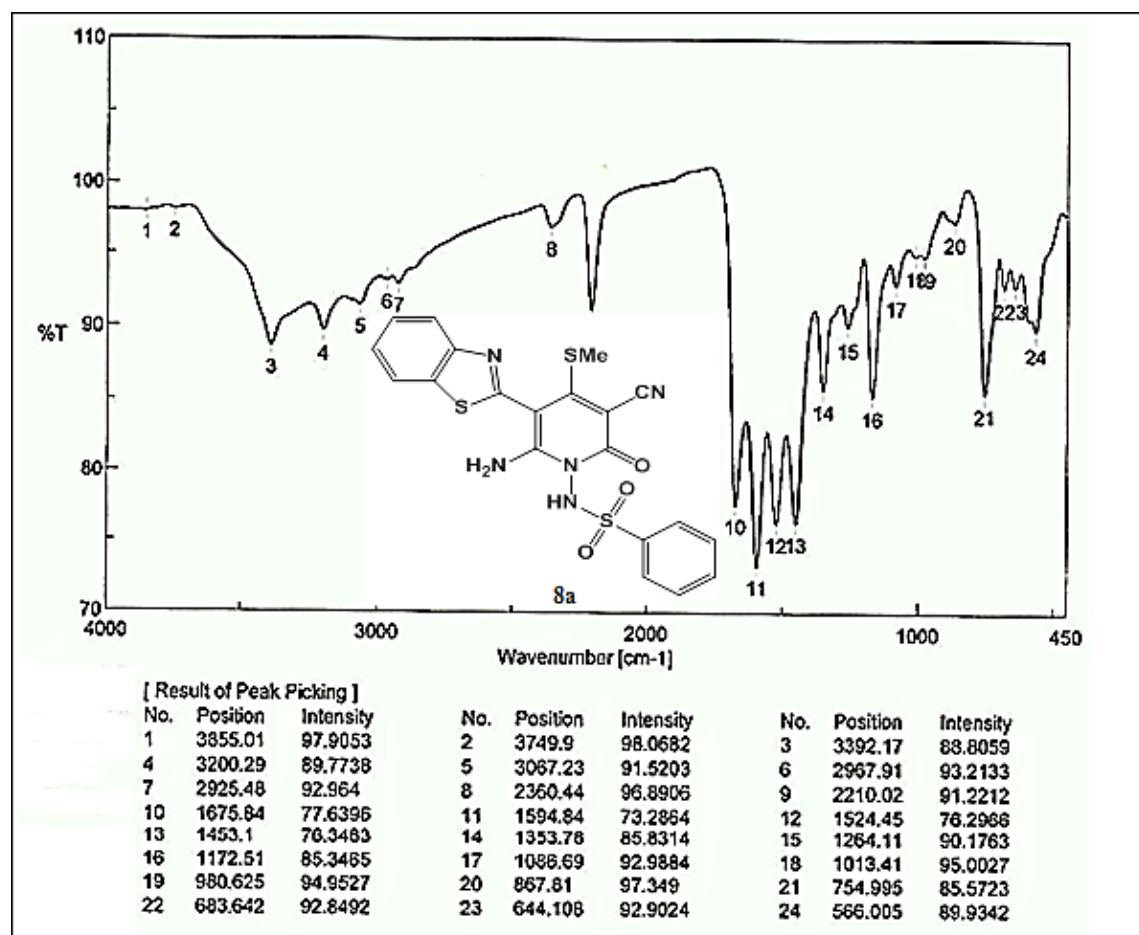

Figure S3 IR Spectrum of compound 8a

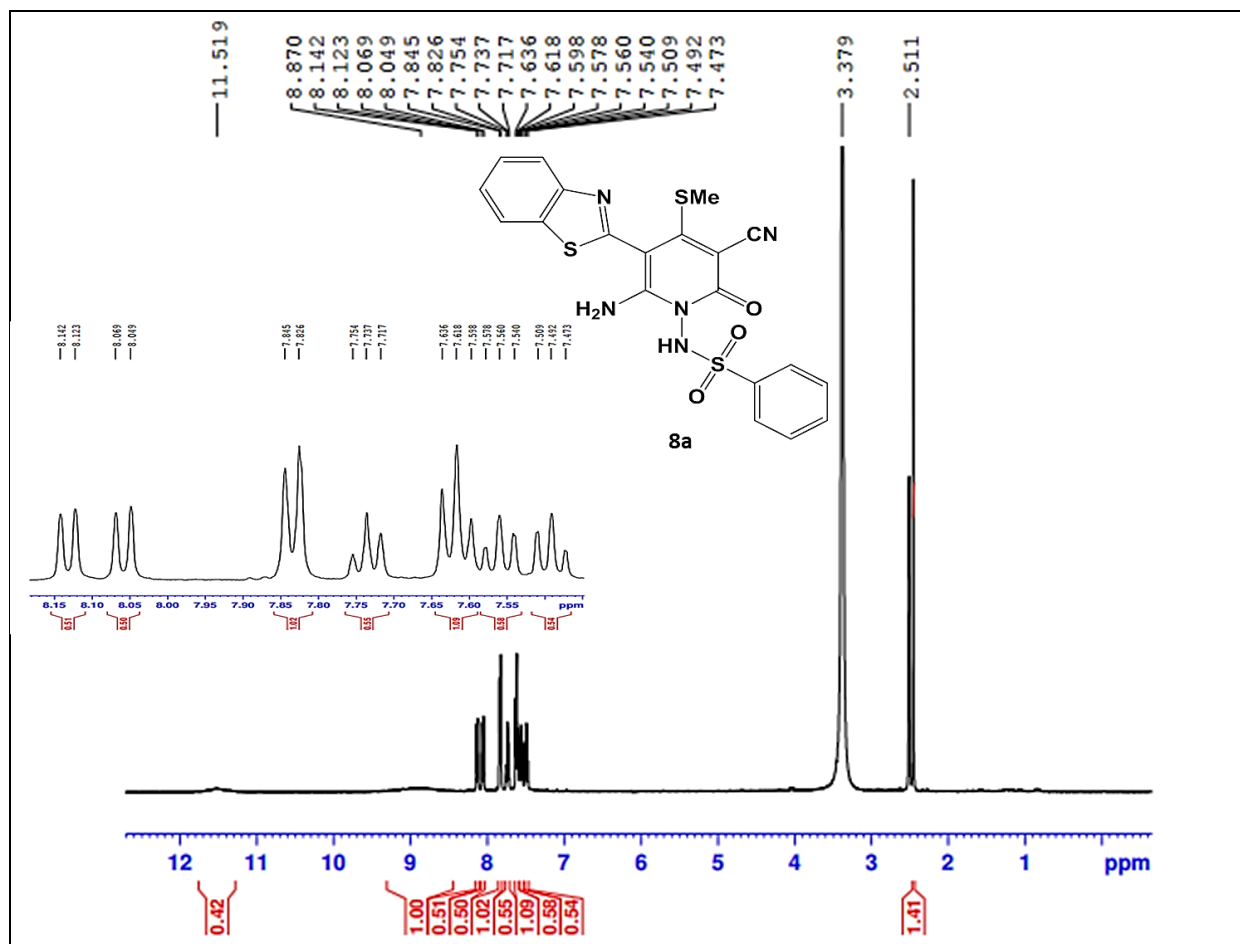

Figure S4 <sup>1</sup>H NMR Spectrum of compound **8a**

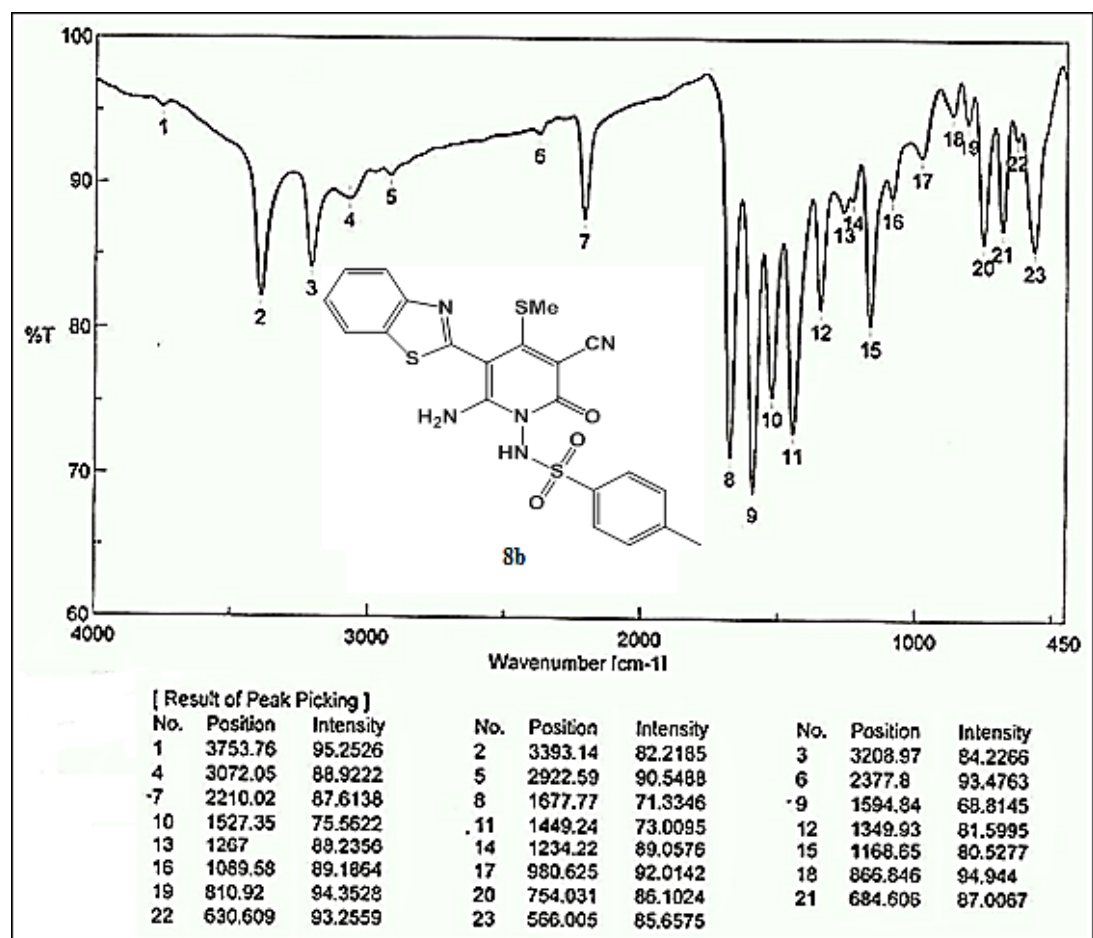

Figure S5 IR Spectrum of compound 8b

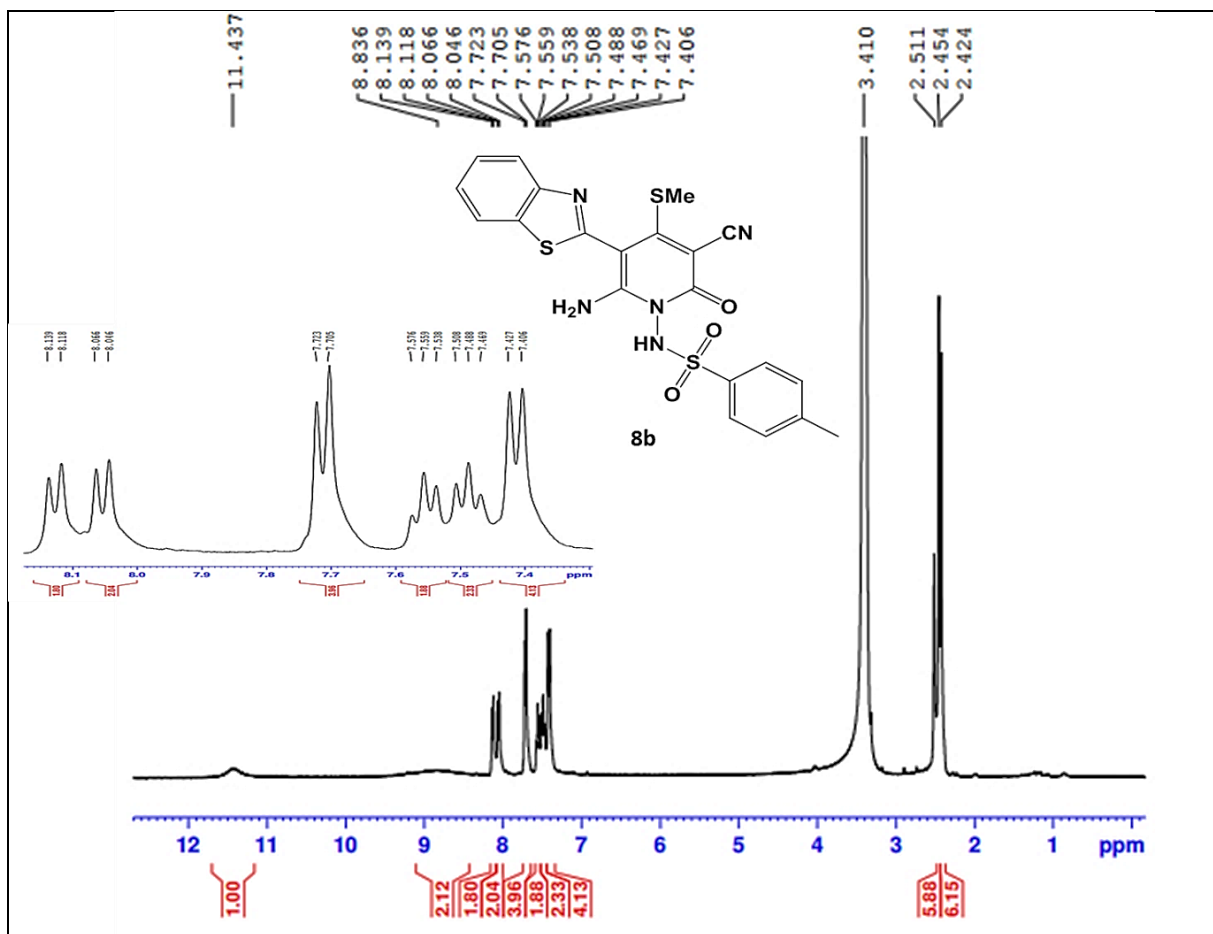

**Figure S6** <sup>1</sup>H NMR Spectrum of compound **8b**

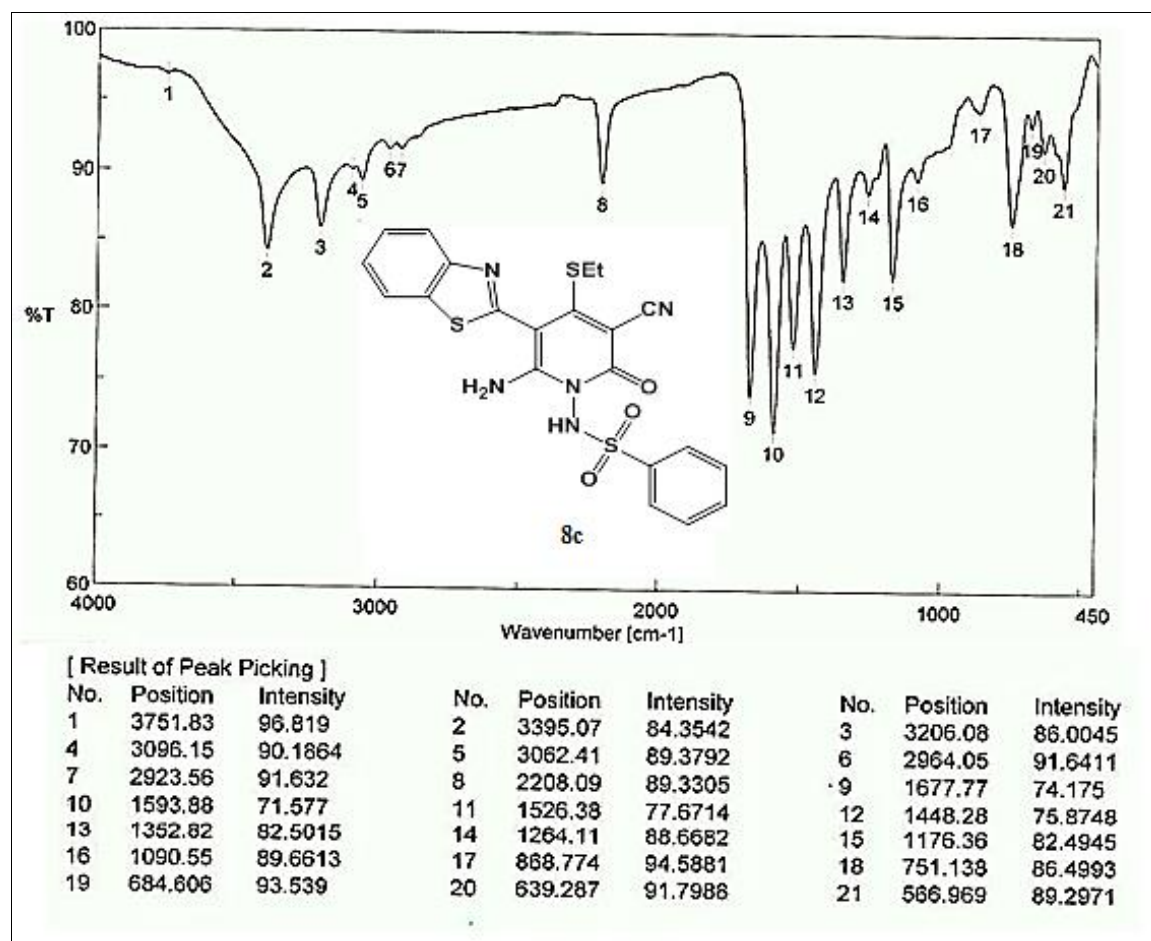

Figure S7 IR Spectrum of compound **8c**



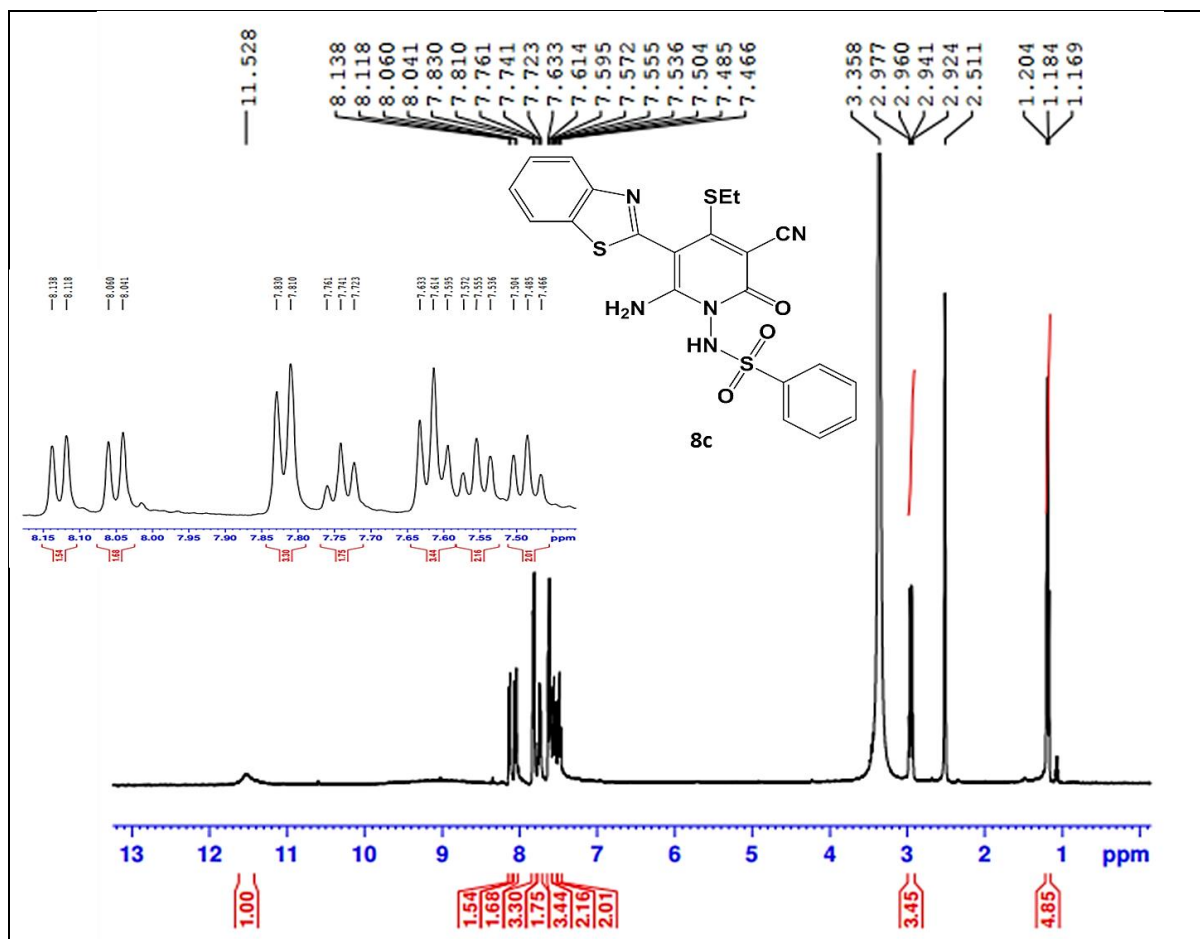

Figure S8  $^1\text{H}$  NMR Spectrum of compound **8c**

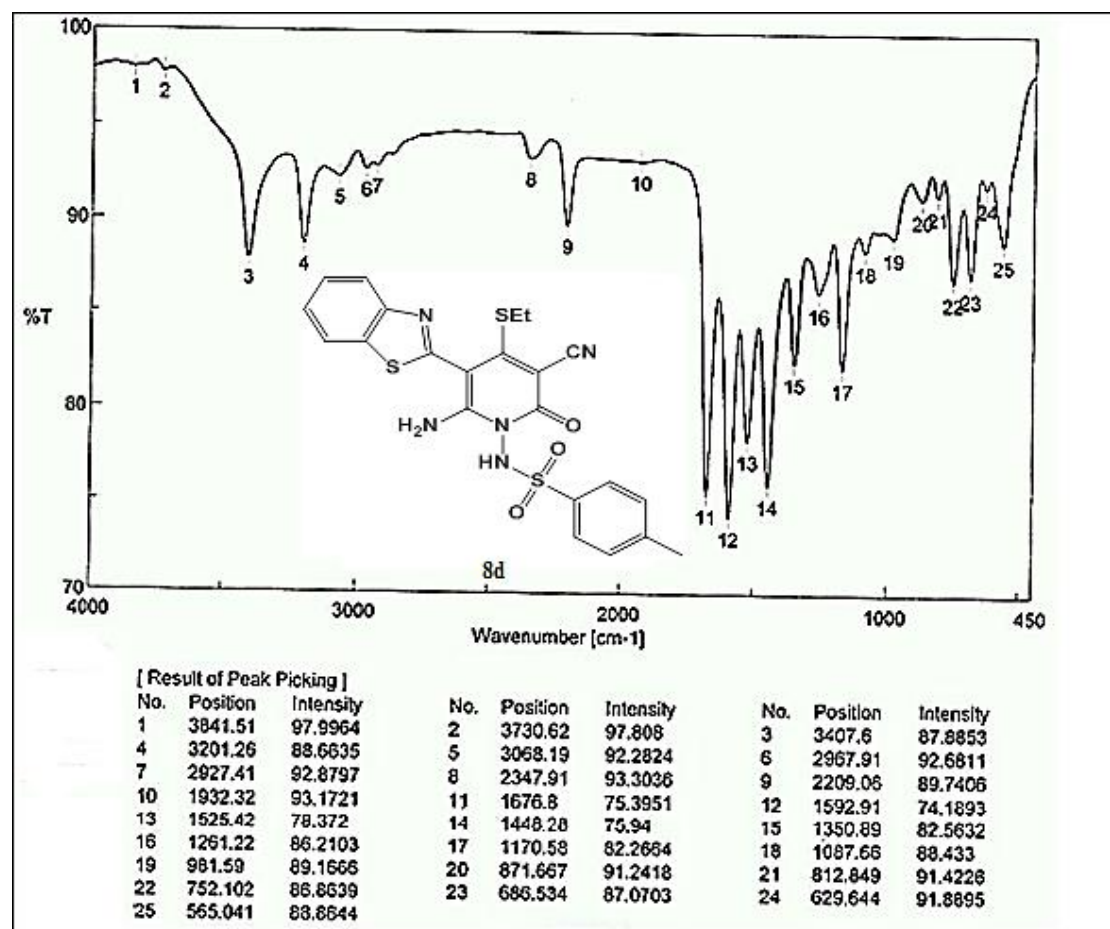

Figure S9 IR Spectrum of compound 3d

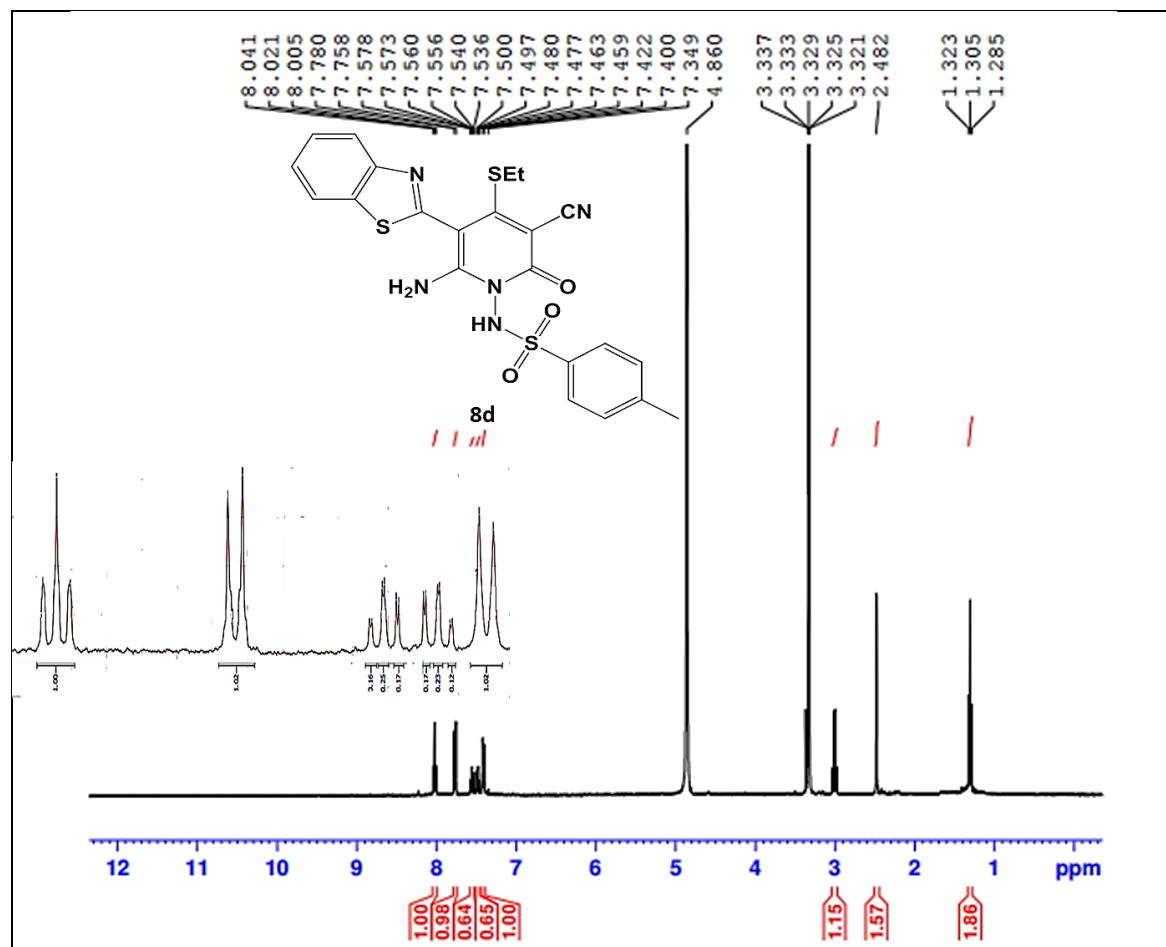

Figure S10 <sup>1</sup>H NMR Spectrum of compound **8d**

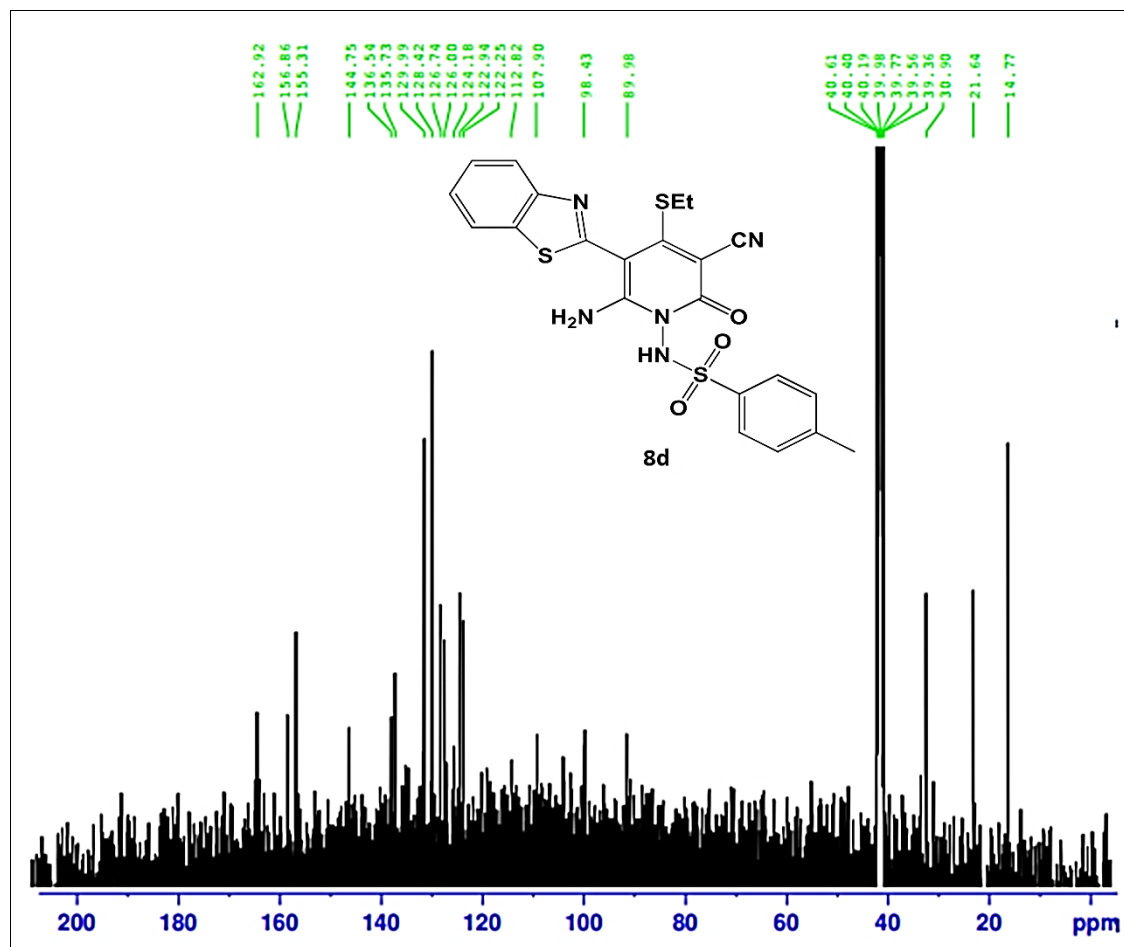

Figure S11 <sup>13</sup>C NMR Spectrum of compound 8d

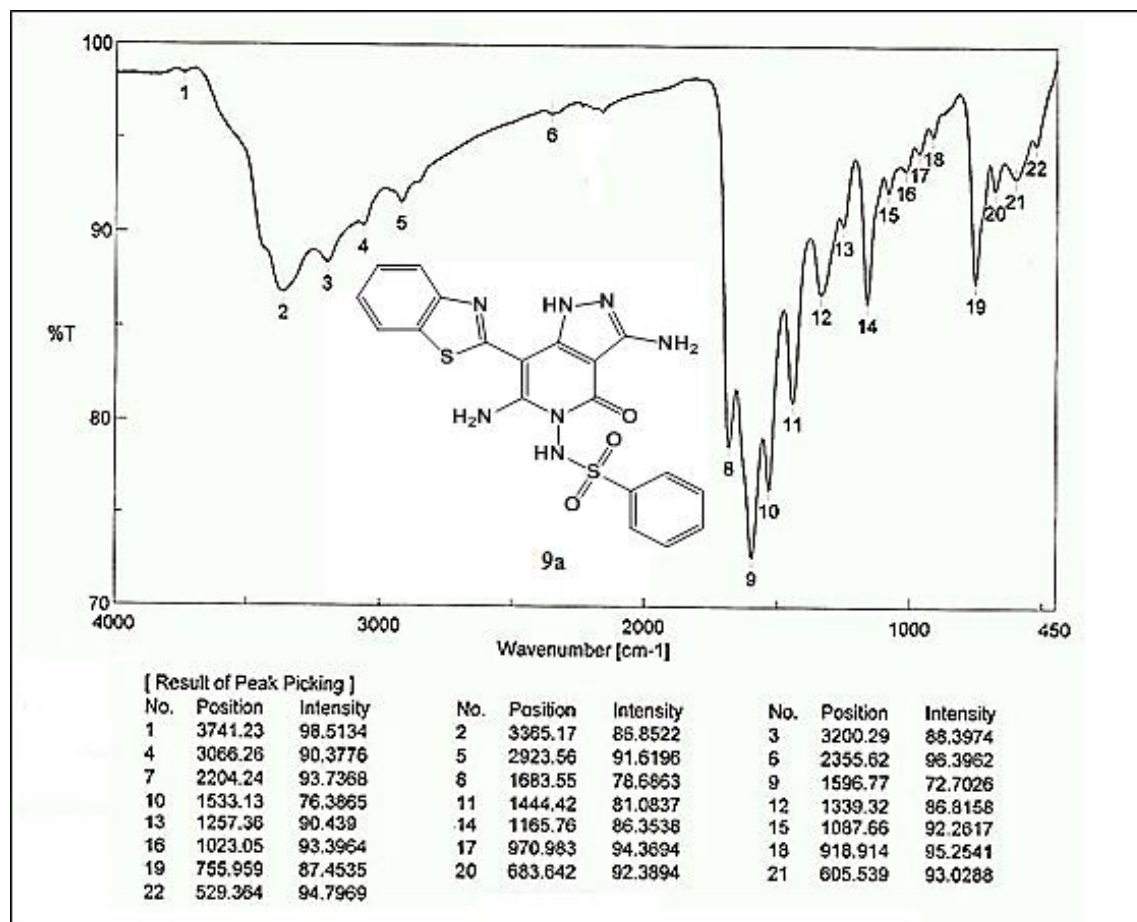

Figure S12 IR Spectrum of compound 9a

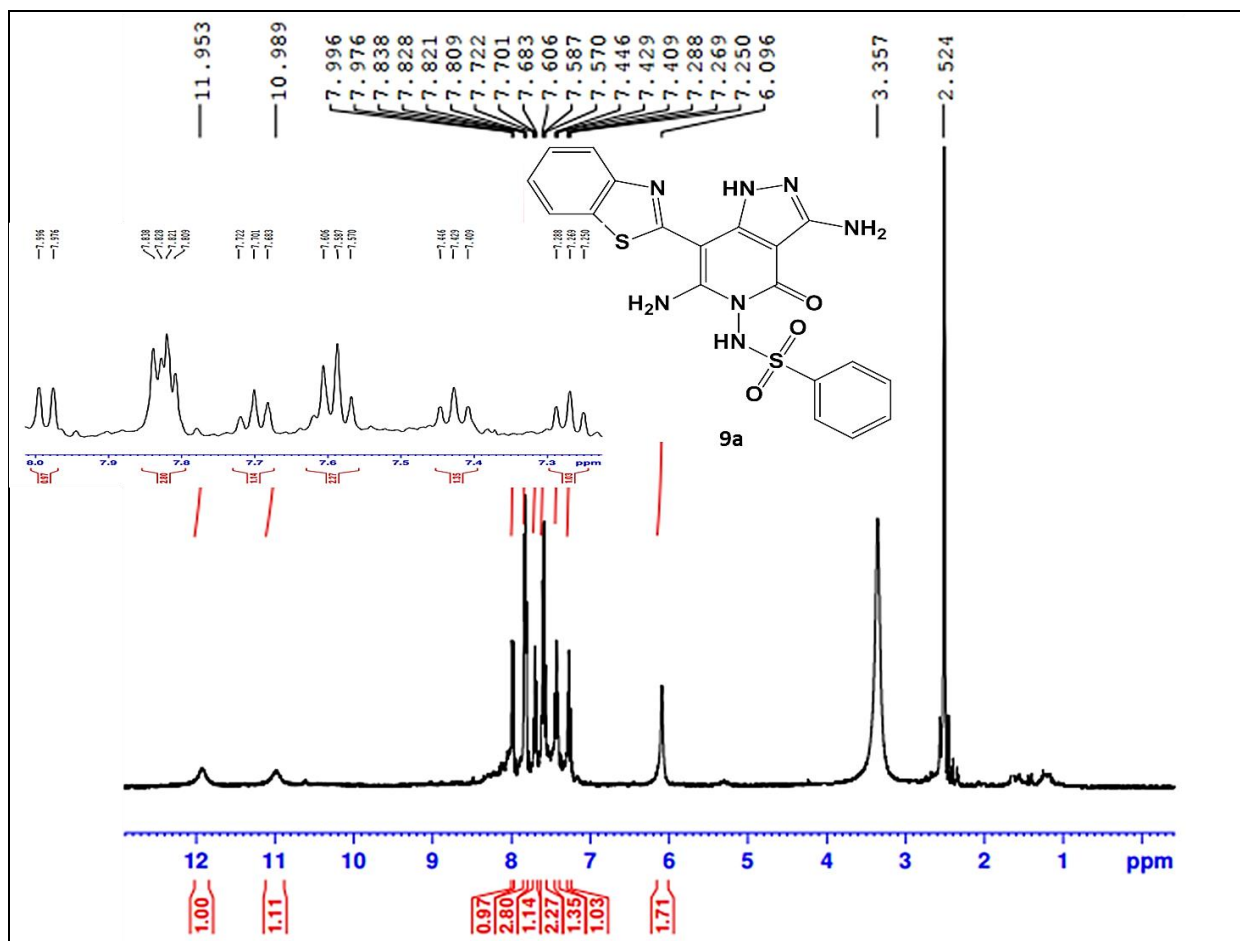

Figure S13  $^1\text{H}$  NMR Spectrum of compound 9a

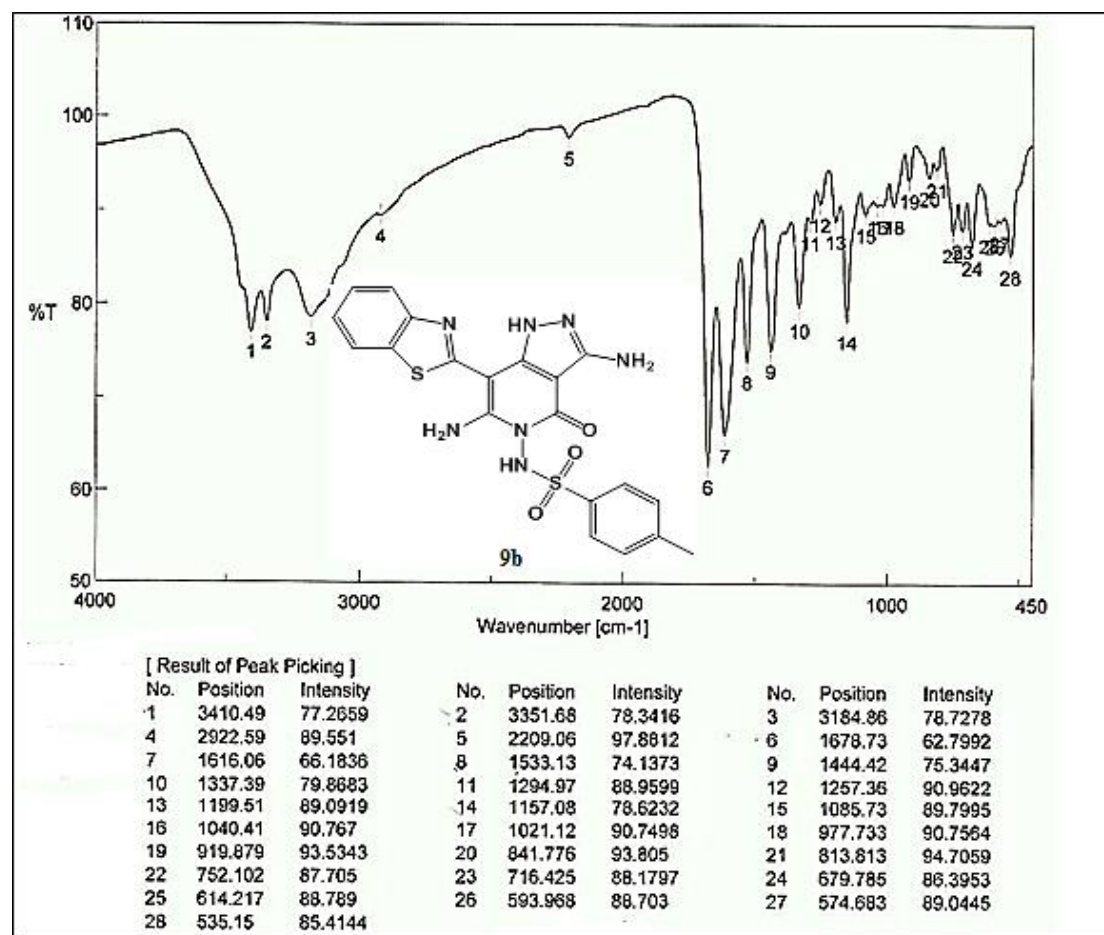

Figure S14 IR Spectrum of compound 9b

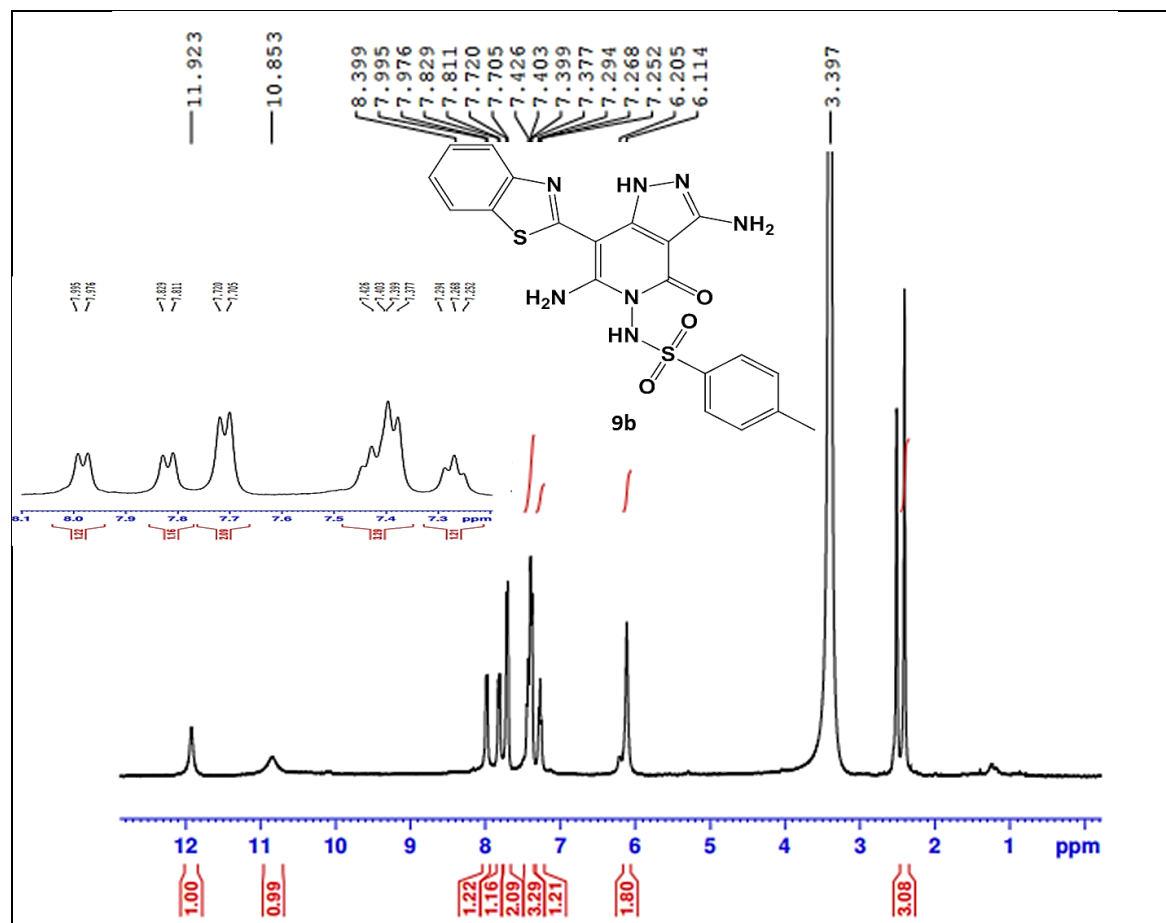

Figure S15 <sup>1</sup>H NMR Spectrum of compound **9b**



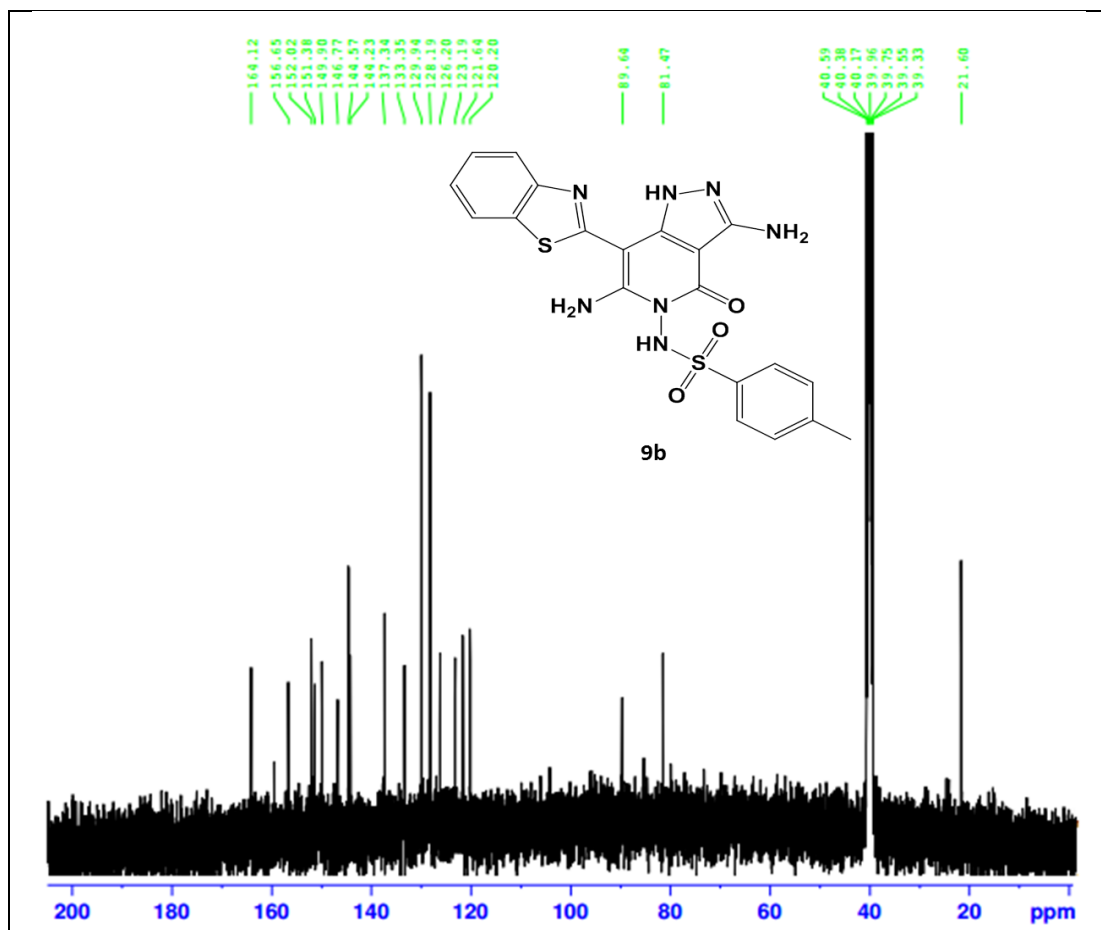

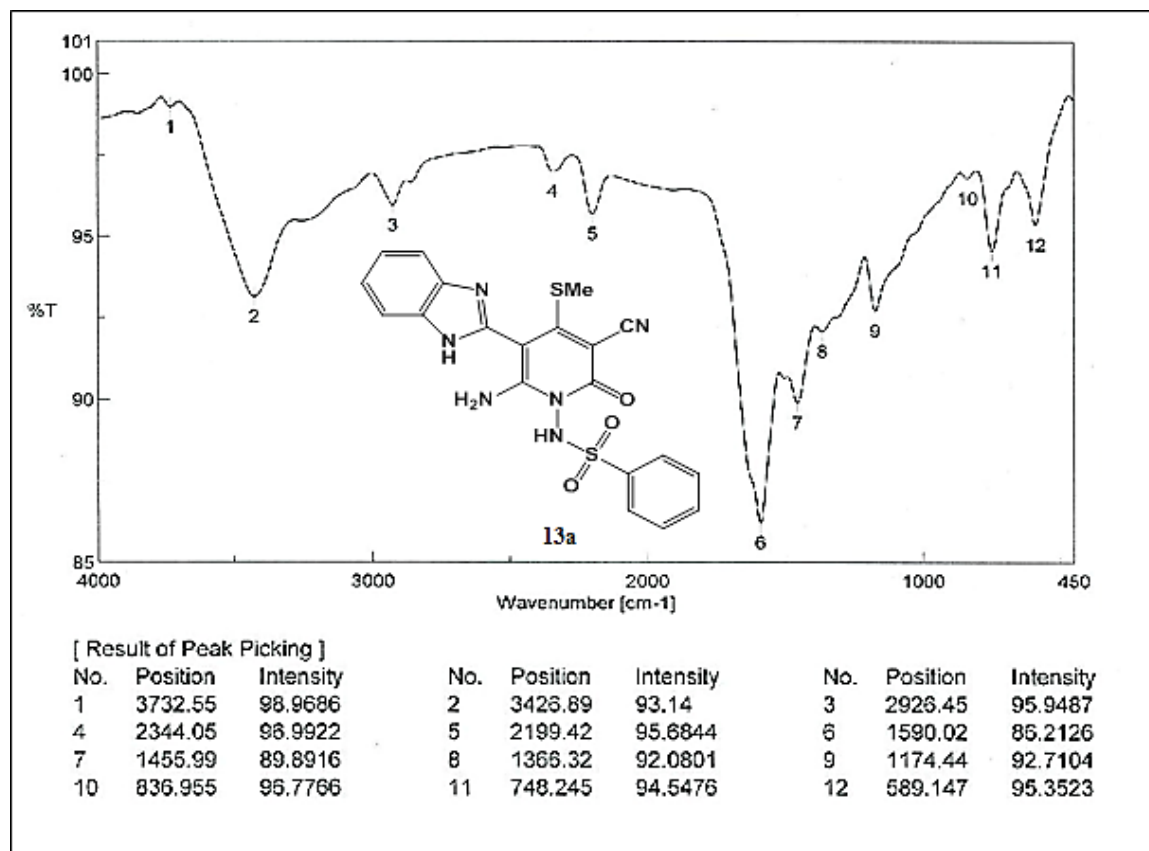

Figure S17 IR Spectrum of compound 13a

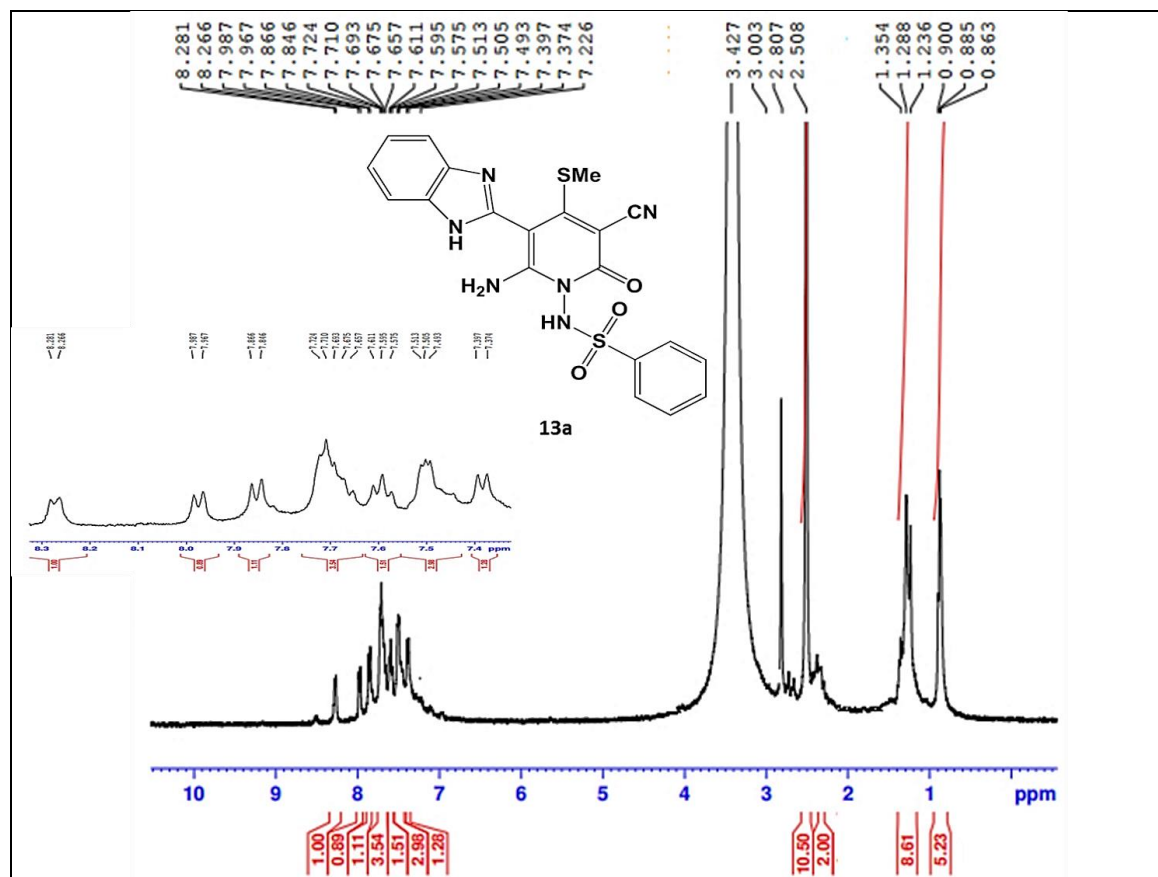

Figure S18 <sup>1</sup>H NMR Spectrum of compound 13b

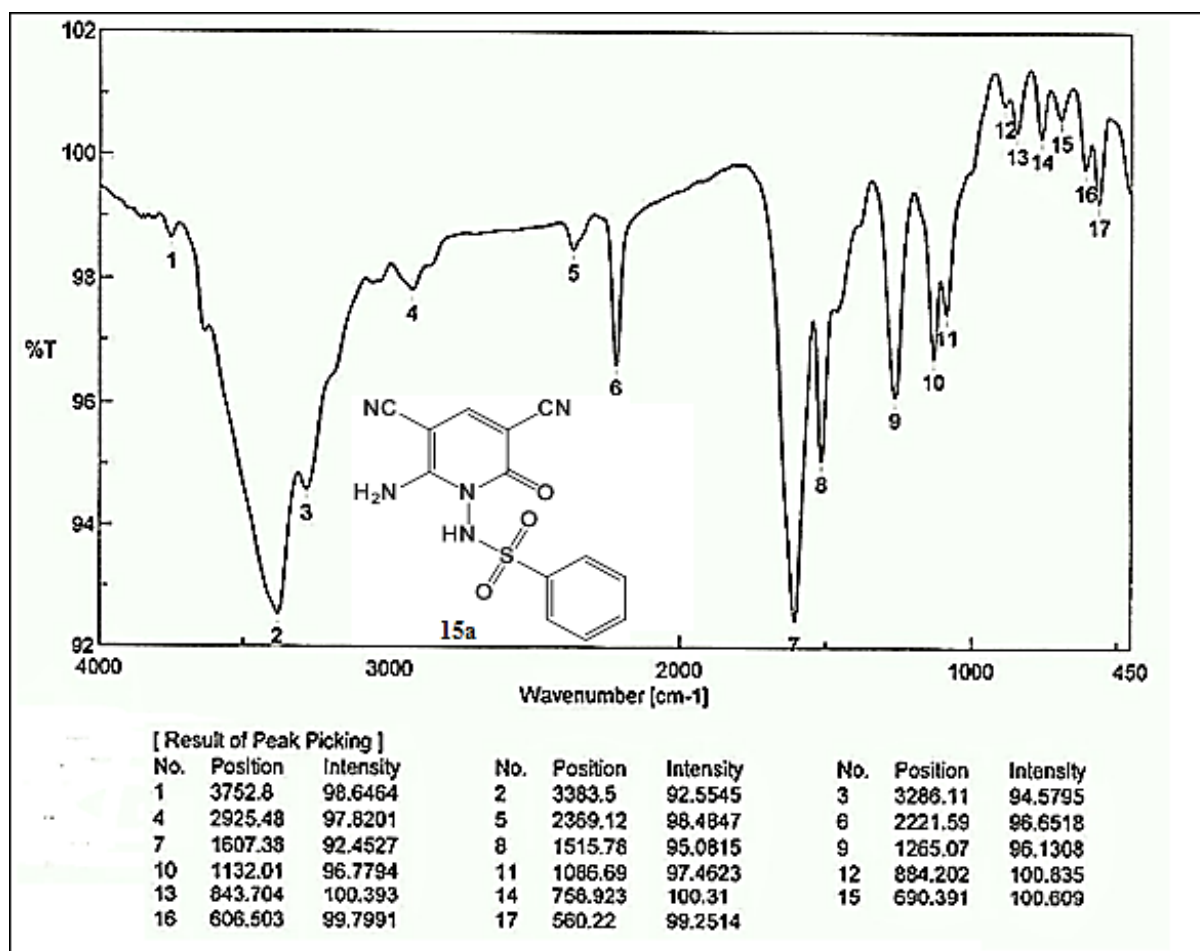

Figure S19 IR Spectrum of compound 15a



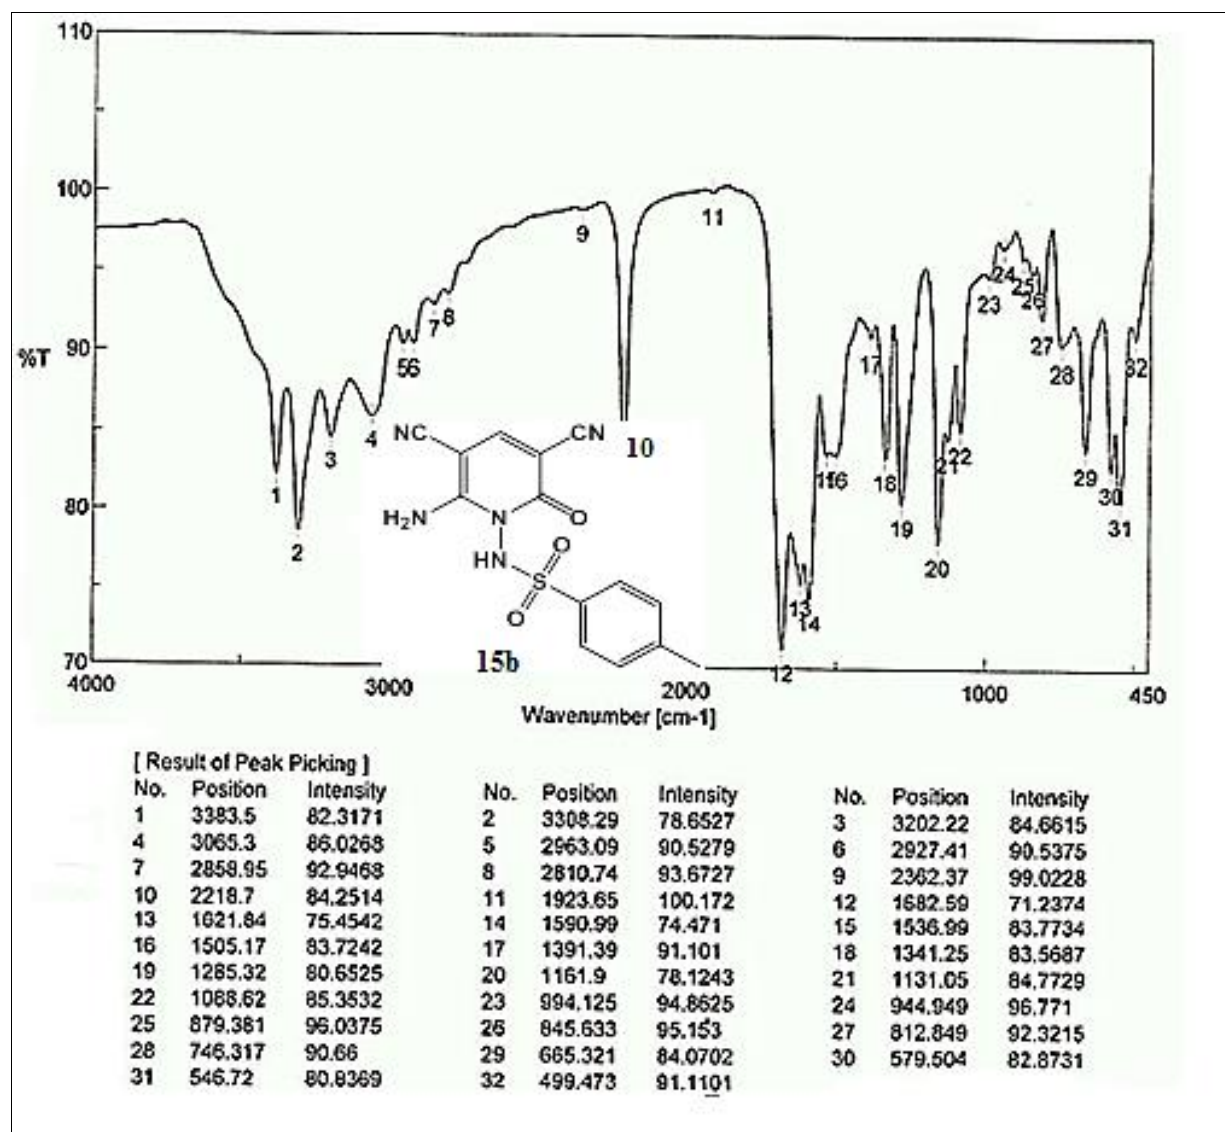

Figure S21 IR Spectrum of compound 15b

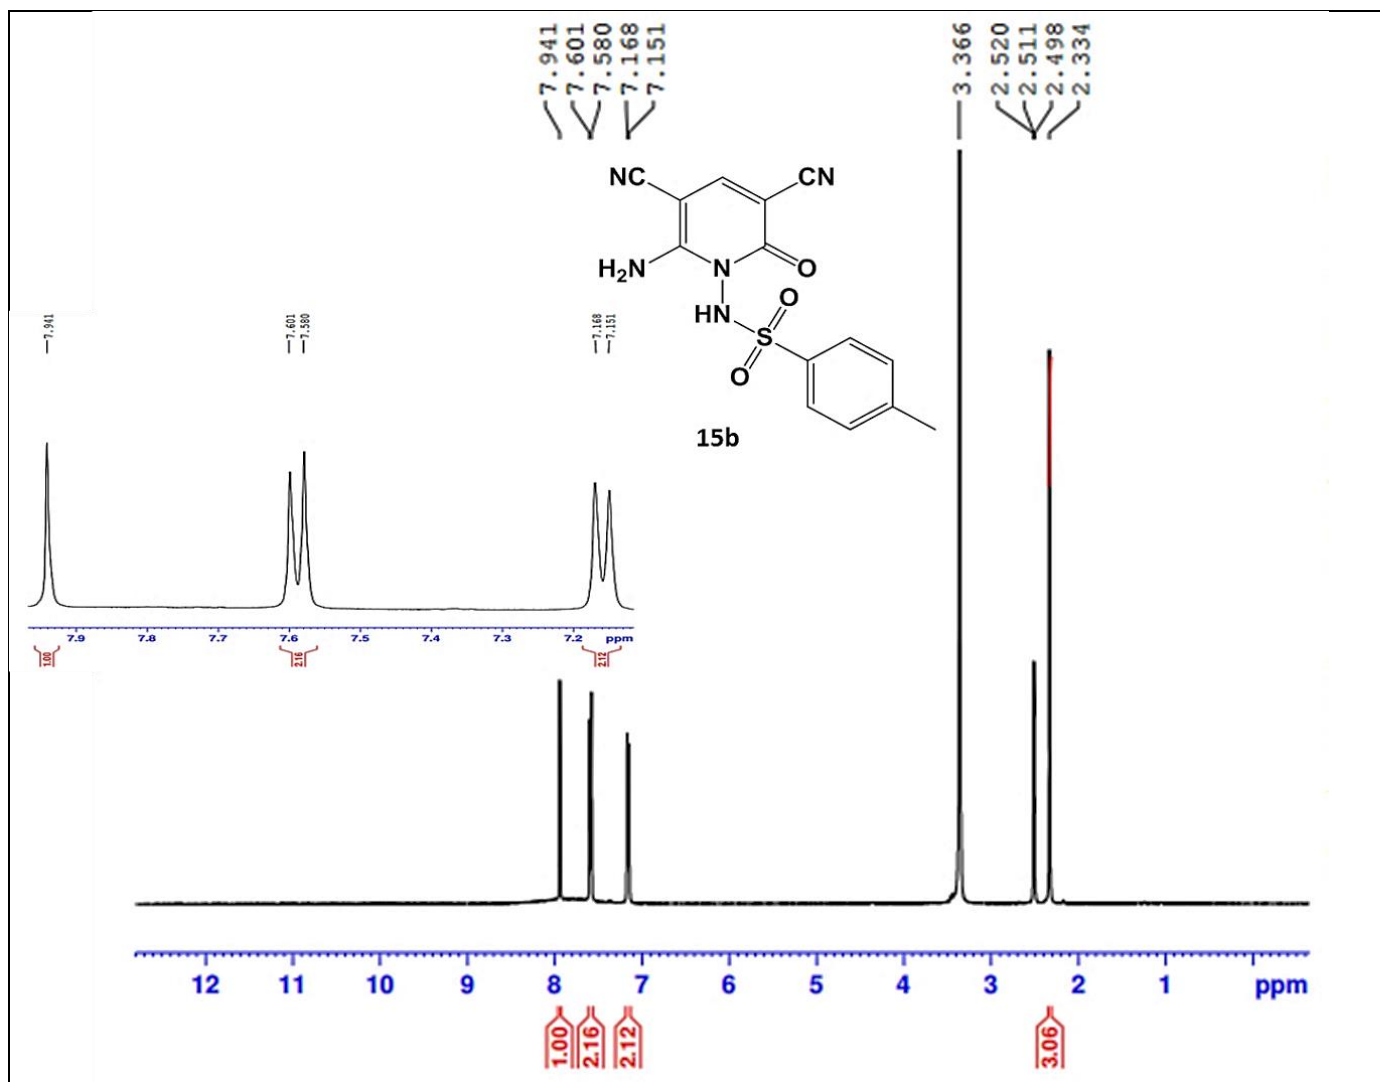

Figure S22  $^1\text{H}$  NMR Spectrum of compound **15b**

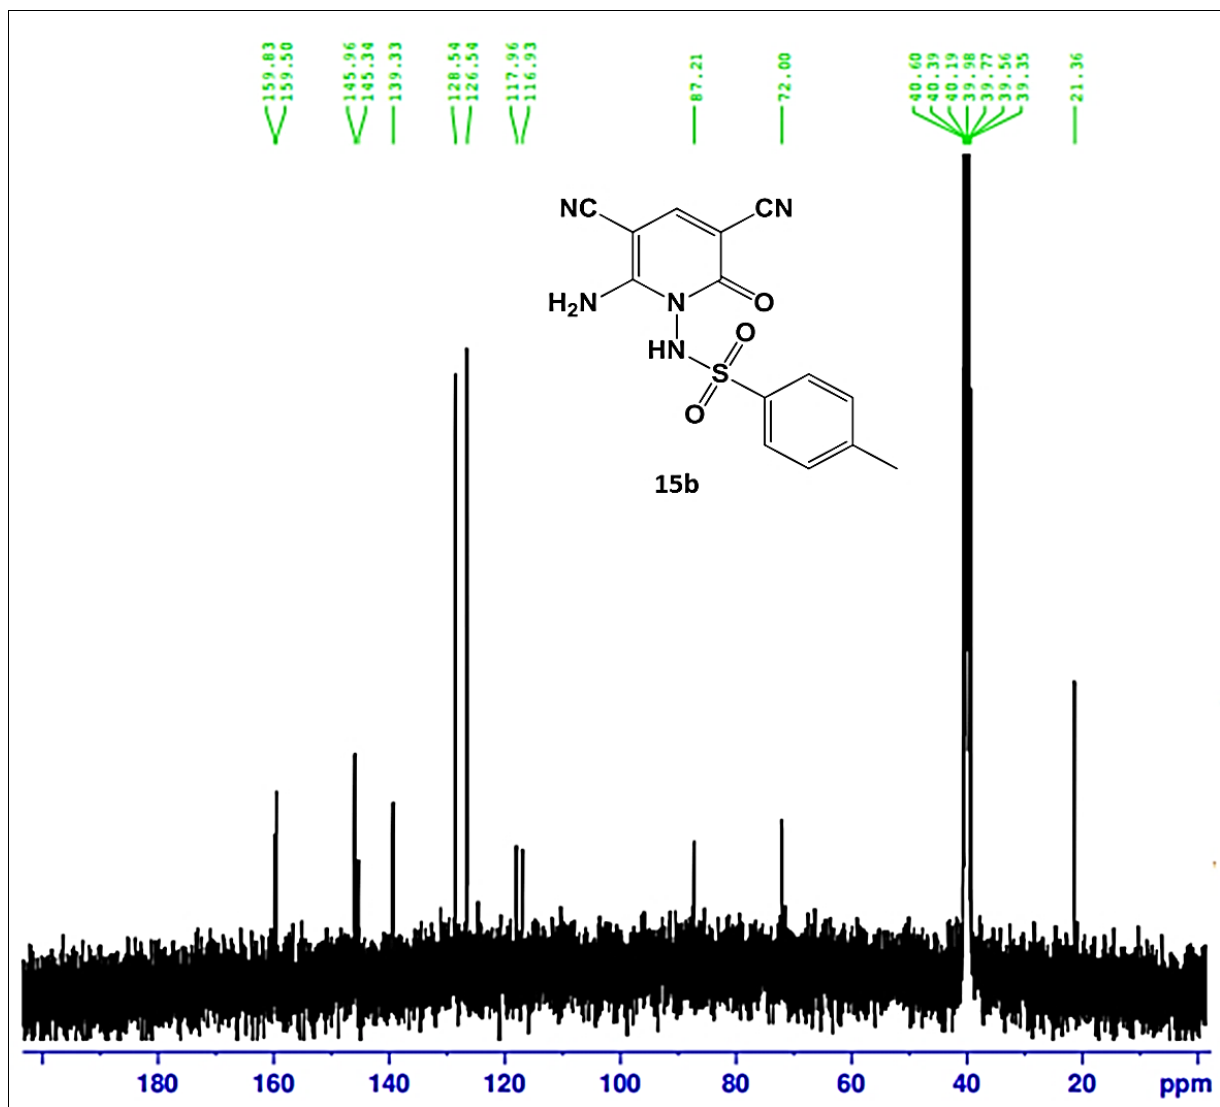

Figure S23  $^{13}\text{C}$  NMR Spectrum of compound 15b



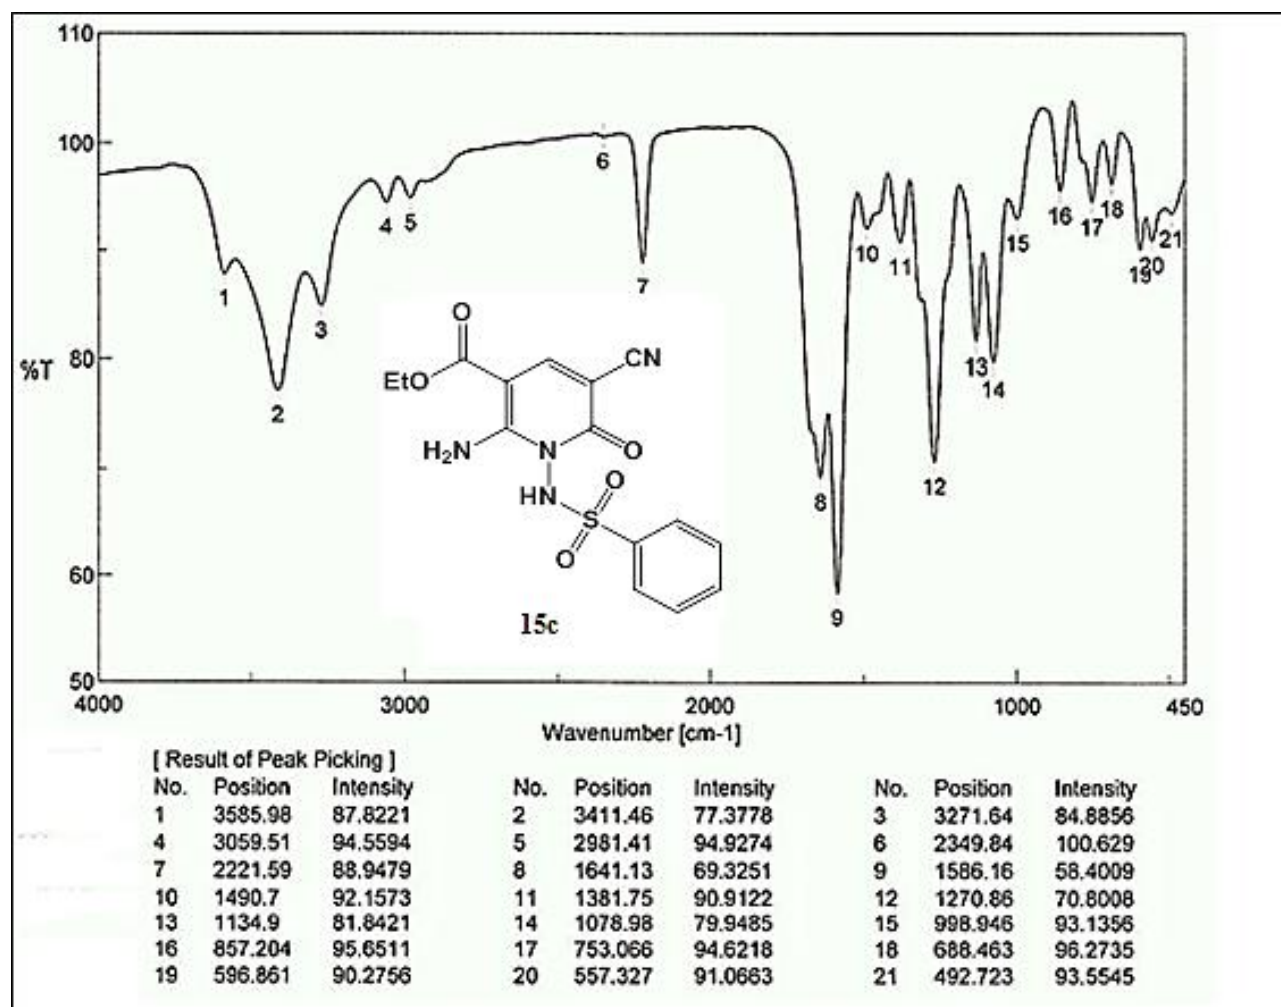

Figure S24 IR Spectrum of compound 15c

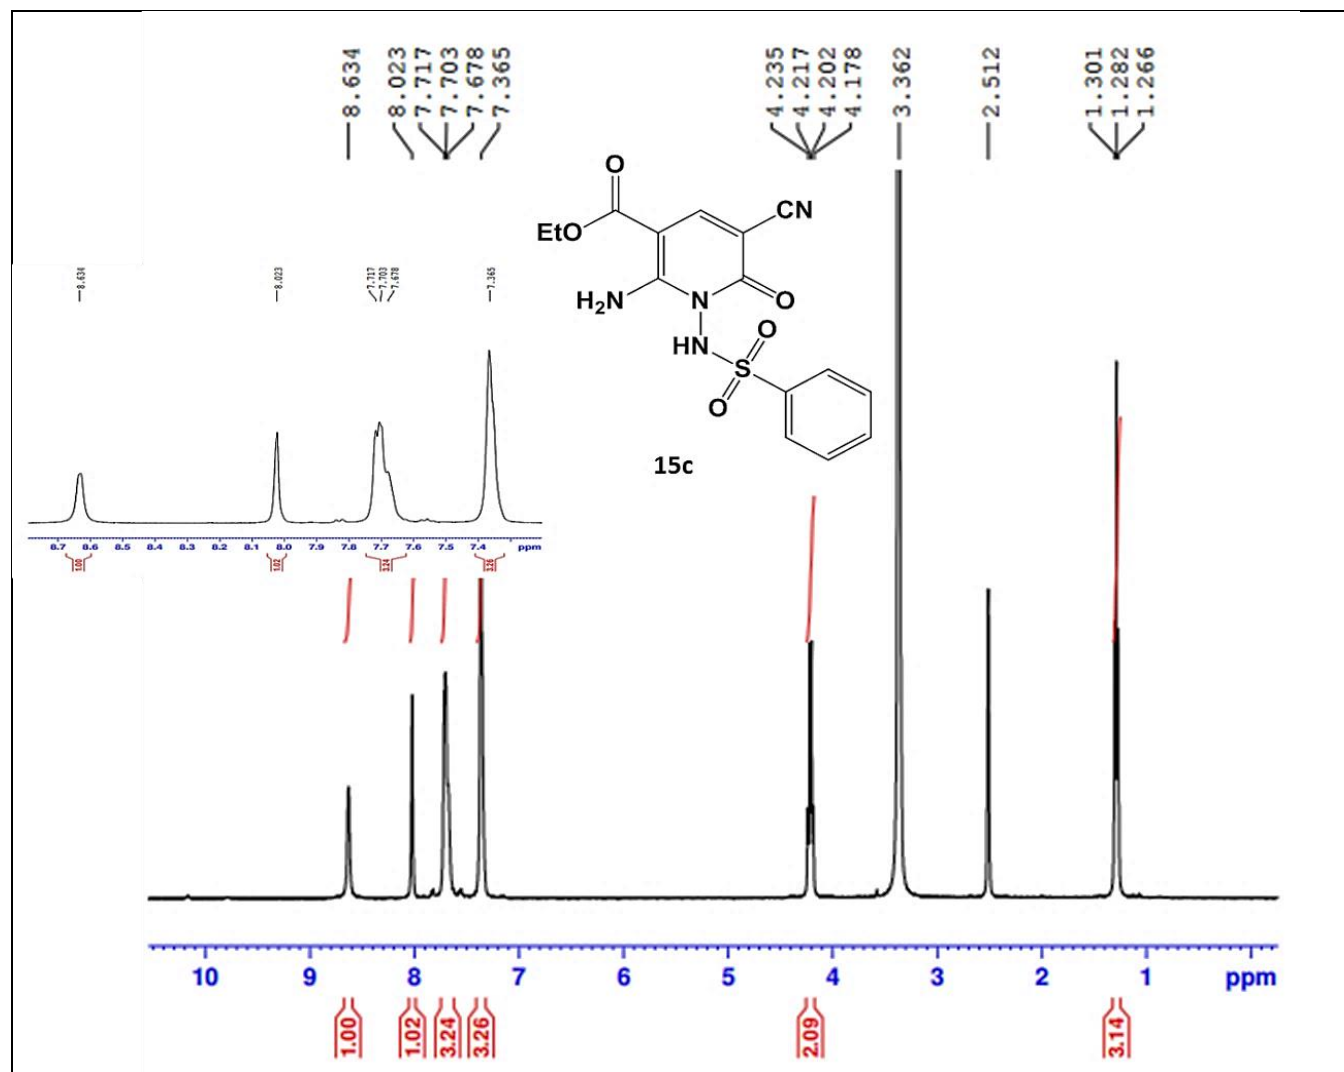

Figure S25 <sup>1</sup>H NMR Spectrum of compound 15c

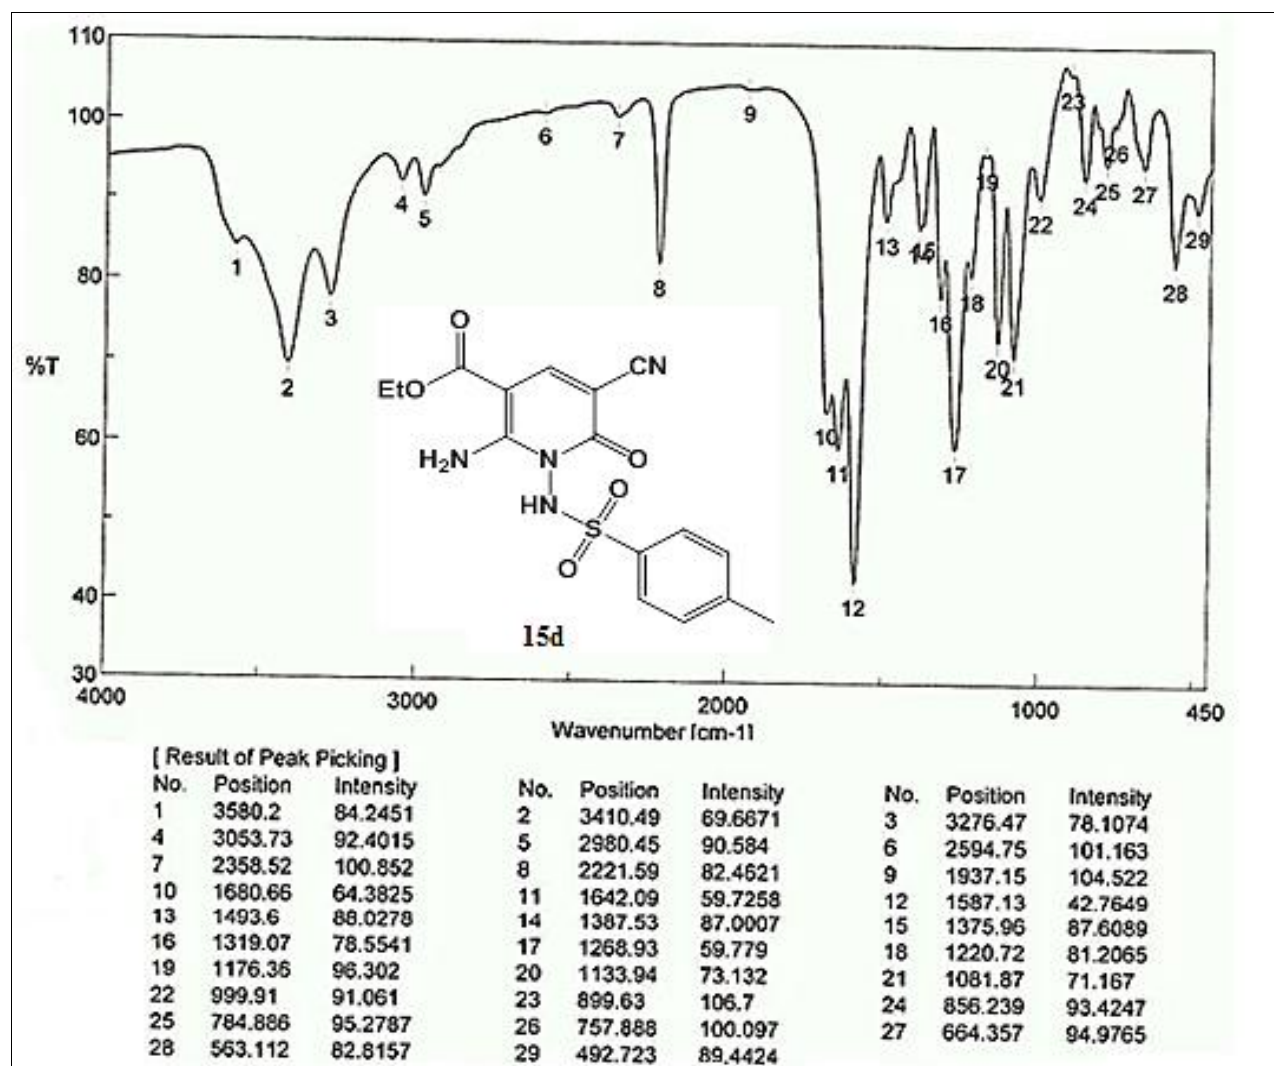

Figure S26 IR Spectrum of compound 15d

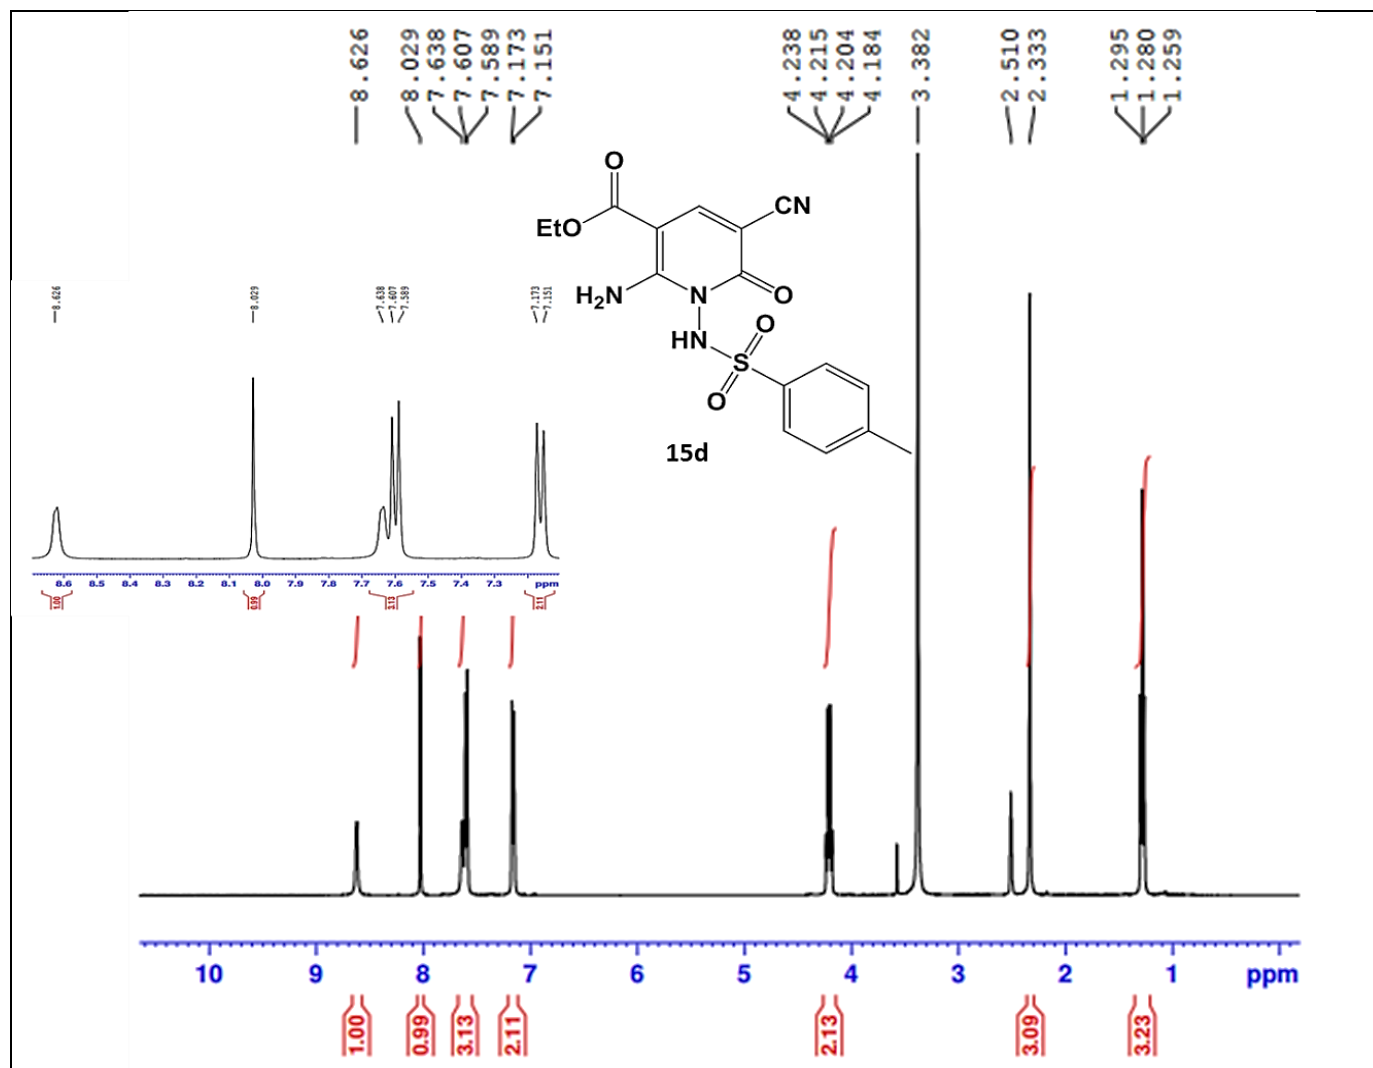

Figure S27 <sup>1</sup>H NMR Spectrum of compound 15d

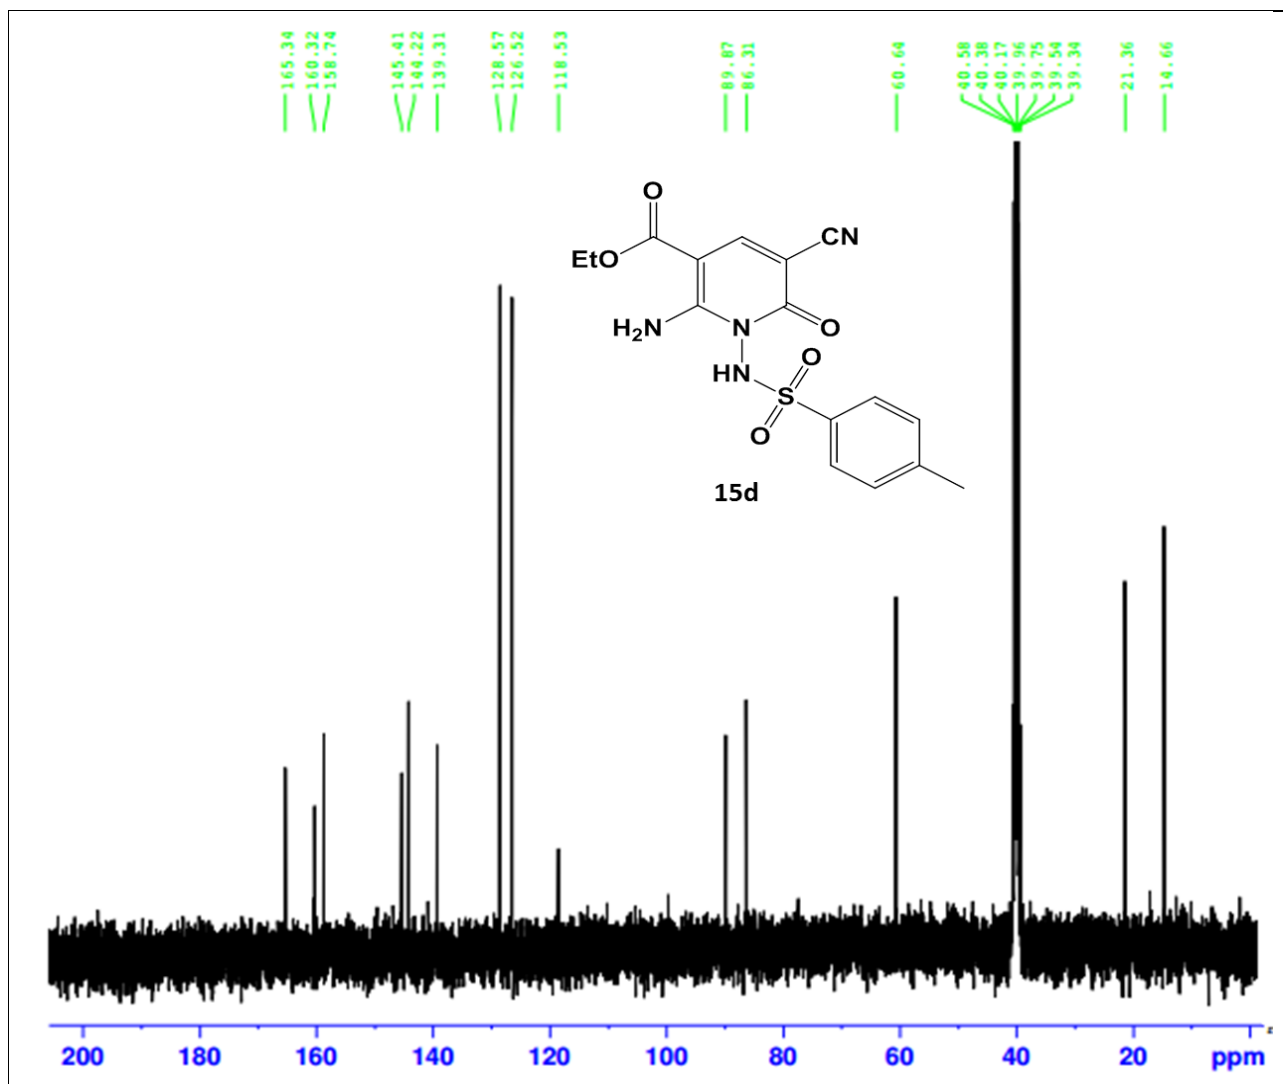

Figure S28 <sup>13</sup>C NMR Spectrum of compound 15d

**Table S1.** Non-toxic doses of tested compounds on FRHK-4, Hep2, BGM, Vero, and Huh 7.5 cell lines.

| Tested materials | Nontoxic dose on <b>FRHK-4</b> cell line (µg/mL) | Nontoxic dose on <b>Hep2</b> cell line (µg/mL) | Nontoxic dose on <b>BGM</b> cell line (µg/mL) | Nontoxic dose on <b>Vero</b> cell line (µg/mL) | Nontoxic dose on <b>Huh 7.5</b> cell line (µg/mL) |
|------------------|--------------------------------------------------|------------------------------------------------|-----------------------------------------------|------------------------------------------------|---------------------------------------------------|
| <b>3b</b>        | 110                                              | 110                                            | 110                                           | 110                                            | 100                                               |
| <b>8a</b>        | 100                                              | 100                                            | 90                                            | 100                                            | 100                                               |
| <b>8b</b>        | 110                                              | 110                                            | 110                                           | 110                                            | 100                                               |
| <b>8c</b>        | 120                                              | 120                                            | 120                                           | 120                                            | 120                                               |
| <b>8d</b>        | 120                                              | 120                                            | 120                                           | 120                                            | 120                                               |
| <b>9a</b>        | 90                                               | 90                                             | 90                                            | 90                                             | 90                                                |
| <b>9b</b>        | 90                                               | 90                                             | 90                                            | 90                                             | 90                                                |
| <b>13a</b>       | 100                                              | 100                                            | 100                                           | 100                                            | 100                                               |
| <b>15a</b>       | 100                                              | 100                                            | 90                                            | 100                                            | 90                                                |
| <b>15b</b>       | 100                                              | 90                                             | 90                                            | 90                                             | 90                                                |
| <b>15c</b>       | 100                                              | 90                                             | 90                                            | 90                                             | 90                                                |
| <b>15d</b>       | 90                                               | 90                                             | 90                                            | 90                                             | 90                                                |

<sup>a</sup>NT = Not tested
